# Supplementary material for: Comparison of Four Oil Extraction Methods for Sinami Fruit (Oenocarpus mapora H. Karst): Evaluating Quality, Polyphenol Content and Antioxidant Activity
Source: MDPI journal article supplement (doi:10.3390/foods11101518), 2022-05-23

Article

# Comparison of Four Oil Extraction Methods for Sinami Fruit (*Oenocarpus mapora* H. Karst): Evaluating Quality, Polyphenol Content and Antioxidant Activity

Ana María Muñoz <sup>1,2</sup>, Sandra Casimiro-Gonzales <sup>1</sup>, Raquel B. Gómez-Coca <sup>3</sup>, Wenceslao Moreda <sup>3</sup>, Ivan Best <sup>1,2</sup>, María Isabel Cajo-Pinche <sup>4</sup>, Juan Francisco Loja <sup>5</sup>, Elena Ibañez <sup>6</sup>, Alejandro Cifuentes <sup>6</sup> and Fernando Ramos-Escudero <sup>2,7,\*</sup>

<sup>1</sup> Instituto de Ciencias de Los Alimentos y Nutrición, Universidad San Ignacio de Loyola (ICAN-USIL), Campus Pachacamac, Sección B, Parcela 1, Fundo La Carolina, Pachacamac, Lima 15823, Peru; amunoz@usil.edu.pe (A.M.M.); scasimiro@usil.edu.pe (S.C.-G.); ibest@usil.edu.pe (I.B.)

<sup>2</sup> Unidad de Investigación en Nutrición, Salud, Alimentos Funcionales y Nutraceuticos, Universidad San Ignacio de Loyola (UNUSAN-USIL), Av. La Fontana 750, Lima 15024, Peru

<sup>3</sup> Instituto de la Grasa, CSIC, Campus Universidad Pablo de Olavide, Building 46, Ctra. de Utrera km 1, 41013 Sevilla, Spain; raquel.coca@ig.csic.es (R.B.G.-C.); wmoreda@ig.csic.es (W.M.)

<sup>4</sup> Carrera Profesional de Ingeniería Agroindustrial, Universidad Nacional Amazónica de Madre de Dios (UNAMAD), Jr. Jorge Chávez 1160, Puerto Maldonado 17001, Peru; cajo\_maisa@hotmail.com

<sup>5</sup> Asociación para la Conservación de la Cuenca Amazónica (ACCA), Madre de Dios 17001, Peru; jloja@conservacionamazonica.org

<sup>6</sup> Foodomics Laboratory, Instituto de Investigación en Ciencias de la Alimentación (CIAL, CSIC-UAM), Nicolás Cabrera 9, Campus de Cantoblanco, 28049 Madrid, Spain; elena.ibanez@csic.es (E.I.); a.cifuentes@csic.es (A.C.)

<sup>7</sup> Facultad de Ciencias de la Salud, Universidad San Ignacio de Loyola, Av. La Fontana 750, Lima 15024, Peru

\* Correspondence: dramos@usil.edu.pe or diomedes.fernando@gmail.com

Figure S1. Static extraction of sinami oil

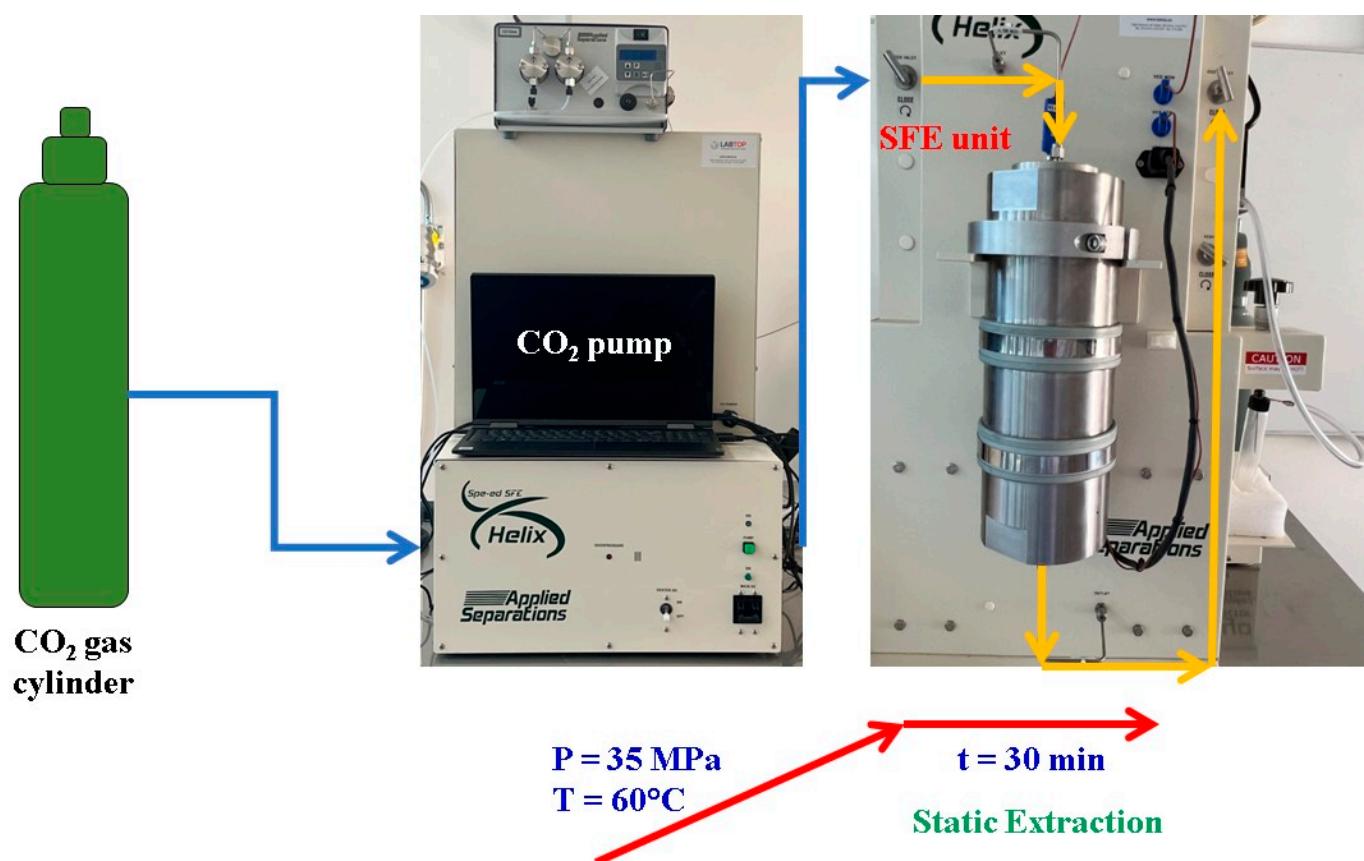

Supplement: s1 [file s1]
